# Supplementary material for: Vertical heterogeneity of hydrocarbon-degrading bacteria in a core sediment sample from the Central Indian Ridge
Source: Frontiers journal article supplement (doi:10.3389/fmars.2023.1170238), 2023-04-27
Supplement: Table_3.docx [file Table_3.docx]

| ID | MCH | HEX | BLK |
| --- | --- | --- | --- |
| *Proteobacteria* | 0.876 | 0.944 | 0.363 |
| *Firmicutes* | 0.095 | 0.016 | 0.304 |
| *Actinobacteria* | 0.011 | 0.018 | 0.147 |
| *Bacteroidetes* | 0.007 | 0.014 | 0.094 |
| *Cyanobacteria* | 0.000 | 0.000 | 0.033 |
| *Chloroflexi* | 0.001 | 0.001 | 0.013 |
| *Deinococcus-Thermus* | 0.000 | 0.000 | 0.011 |
| *Acidobacteria* | 0.001 | 0.000 | 0.006 |
| *Patescibacteria* | 0.000 | 0.000 | 0.006 |
| *Epsilonbacteraeota* | 0.002 | 0.000 | 0.004 |
| Others | 0.007 | 0.006 | 0.019 |

**Supplementary Table 3.** **The relative abundance of dominant bacteria in the hydrocarbon-spiked bacterial assemblages at the phylum level.** The treatment explanation is the same as that in the caption of Supplementary Table 1.
